# Supplementary material for: Blood vessel anastomosis is spatially regulated by Flt1 during angiogenesis
Source: Oxford University Press journal article supplement (doi:10.1242/dev.145672), 2017-02-28
Supplement: dev145672supp.pdf [file dev145672supp.pdf]

## SUPPLEMENTAL MATERIALS AND METHODS

### ***Fluorescence-activated Cell Sorting (FACS) Analysis***

HUVEC were washed with PBS, detached using 1X accutase (Sigma; St. Louis, MO) and then fixed in FACS buffer containing 1% PFA. Cells were analyzed by flow cytometry using a BD Accuri™ C6 flow cytometer and CFlow Plus Analysis software (BD Biosciences; San Jose, CA). Samples were manually gated and analyzed using the FloJo v10 software package.

### ***mRNA Preparation and Quantification***

RNA was collected 48h post-treatment using TRIzol® (Life Technologies; Grand Island, NY), according to the manufacturer's protocol, and converted to cDNA using iScript (BioRad; Berkeley, CA), according to the manufacturer's protocol. qRT-PCR  $\Delta\Delta CT$  analysis was performed on a 7900HT Fast Real-Time PCR system (Applied Biosystems; Grand Island, NY). Primers for Flt1 and glyceraldehyde 3-phosphate dehydrogenase (GAPDH) were used to quantify mRNA (**Table S3**). Data are reported normalized to GAPDH.

**Table S1: Antibodies and Nuclear Stain.**

| Primary Antibody              | Company           | CATALOG # | Use          | Western Blot Dilution | Immunofluorescence Dilution/Time |
|-------------------------------|-------------------|-----------|--------------|-----------------------|----------------------------------|
| $\beta$ -actin                | Cell Signaling    | 3700P     | HUVEC        | 1:10,000              |                                  |
| GFP                           | Abcam             | ab6556    | HUVEC        | 1:7,500               |                                  |
| VEGFR2                        | Cell Signaling    | 2479S     | HUVEC        | 1:2,000               |                                  |
| pVEGFR2-Y1175                 | Cell Signaling    | 2478S     | HUVEC        | 1:1,000               |                                  |
| Flt1                          | Abcam             | ab32152   | HUVEC        | 1:2,000               | 1:1,000; 48h                     |
| PECAM                         | Cell Signaling    | 3528S     | HUVEC        |                       | 1:1,500; 48h                     |
| Conjugated phalloidin         | Life Technologies | ab109202  | HUVEC        |                       | 1:50; 48h                        |
| Alexa Fluor® 488              | Life Technologies | A-21206   | HUVEC        |                       | 1:750; overnight                 |
| Alexa Fluor® 555              | Life Technologies | A-21428   | HUVEC        |                       | 1:750; overnight                 |
| Alexa Fluor® 647              | Life Technologies | A-21235   | HUVEC        |                       | 1:750; overnight                 |
| DRAQ-7                        | Abcam             | ab109202  | HUVEC        |                       | 1:1,000; 1h                      |
| Isolectin conjugated Alexa488 | Life Technologies | I21411    | Mouse retina |                       | 1:100; overnight                 |
| DAPI                          | Life Technologies | D1306     | Mouse retina |                       | 1:1,000; 30 mins                 |

**Table S2: siRNAs for Flt1 Isoforms.**

| Targeted Isoform | Sequence (5'-3')                       |
|------------------|----------------------------------------|
| sFlt1            | GAGCACTGCAACAAAAAGGCTGTTTTCTCTCGGATCTC |
| mFlt1            | GGAAATAGTGGGTTTACATAC                  |

**Table S3: qPCR Primers.**

| Gene  | Forward Primer (5'-3')     | Reverse Primer (5'-3')     |
|-------|----------------------------|----------------------------|
| GAPDH | CCTCAAGATCATCAGCAATGCCTCCT | TTGGTATCGTGGAAGGACTCATGACC |
| Flt1  | AGGGCCTCTGATGGTGATTGTTGA   | ATGCAGCACTACACATGGAGCCTA   |

## SUPPLEMENTAL FIGURES

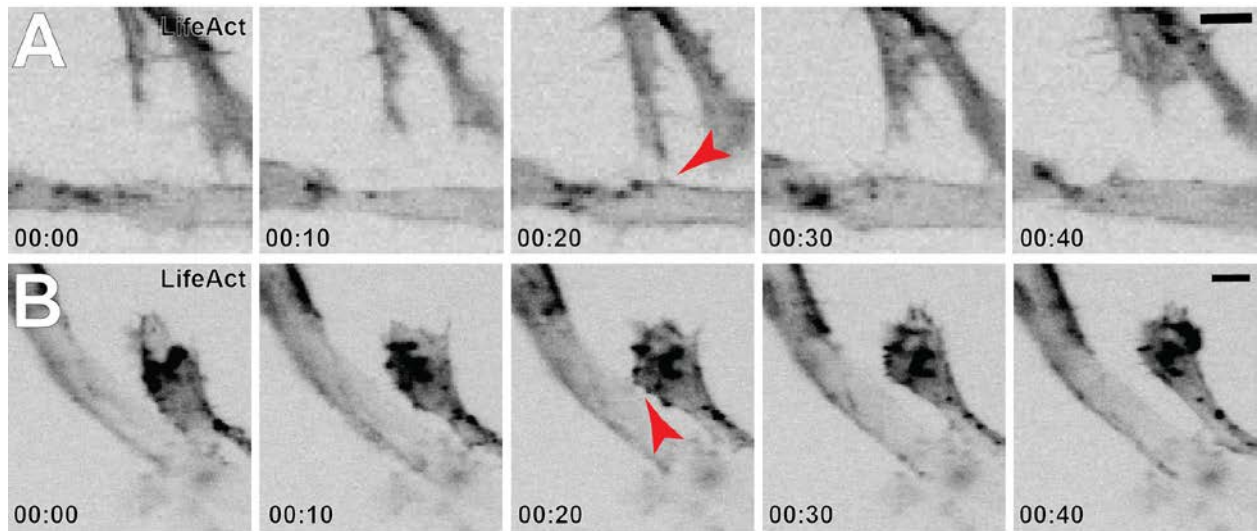

**Figure S1: High Magnification Images of Transient Contacts.**

**(A-B)** Representative time-lapse images of LifeAct infected d3-5 HUVEC sprouts. Transient contact, red arrowhead. Scale bar, 10  $\mu$ m; time (lower left) hrs:mins.

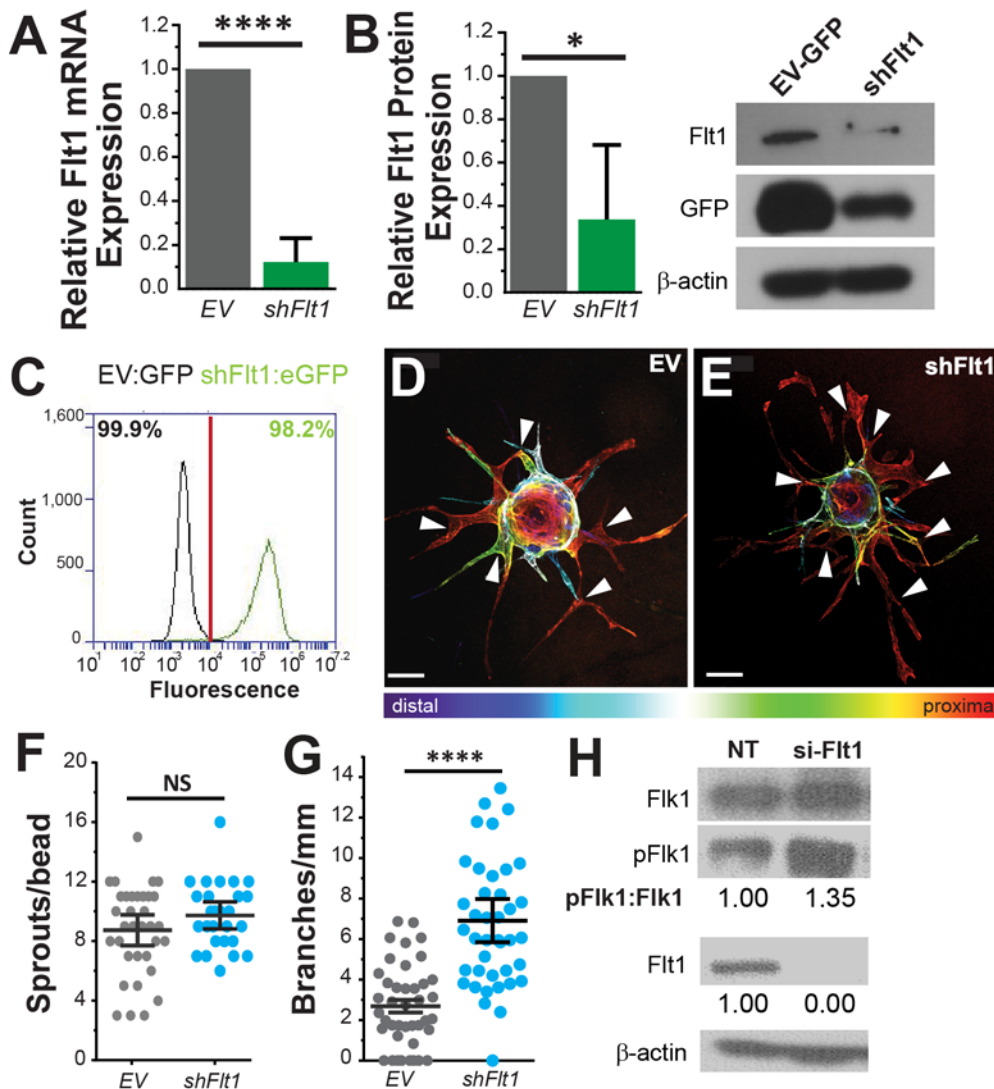

**Figure S2: Flt1 shRNA Validation.**

**(A-C)** HUVEC collected 48h post-infection with indicated lentivirus and analyzed by qRT-PCR (A), Western blot (B), or FACS sorted for infection efficiency (via GFP signal) (C). Flt1 mRNA expression was normalized to GAPDH and relative to control. Flt1 protein expression was normalized to  $\beta$ -actin and relative to EV-GFP. **(D-E)** Representative images of HUVEC sprouts with indicated treatments at d5, stained with phalloidin and depth-encoded. Arrowheads indicate branch points. Scale bar, 50  $\mu$ m. **(F-G)** Quantification of indicated parameters at d5 (control, n=41 beads; shFlt1, n=41 beads). **(H)** Western blot of HUVEC lysates collected 48h after indicated treatments. Protein expression was normalized to  $\beta$ -actin and relative to NT. Fold change from NT shown below lanes. Statistics, Two-tailed Student's t-test (\*,  $p < 0.05$ ; \*\*\*\*,  $p < 0.0001$ ; NS, not significant). Error bars, mean  $\pm$  95% CI.

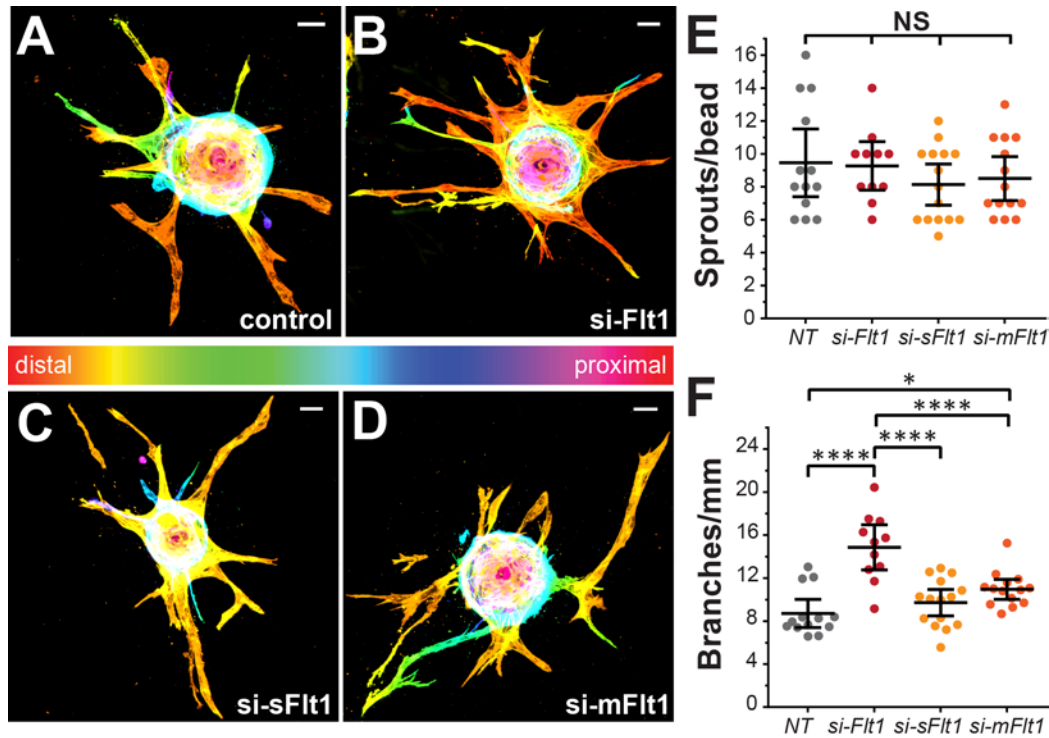

**Figure S3: Isoform Selective Knockdown Validation.**

**(A-D)** Representative images of d5 HUVEC sprouts with indicated treatments, stained for phalloidin and depth-encoded. Scale bar, 50  $\mu$ m. **(E-F)** Quantification of indicated parameters at d5. Control (n=15 beads); total si-Flt1 (n=12 beads); si-sFlt1 (n=15 beads); si-mFlt1 (n=14 beads). Statistics, One-way ANOVA with Bonferroni's post-hoc correction (\*, p < 0.05; \*\*\*\*, p < 0.0001; NS, not significant). Error bars, mean  $\pm$  95% CI.

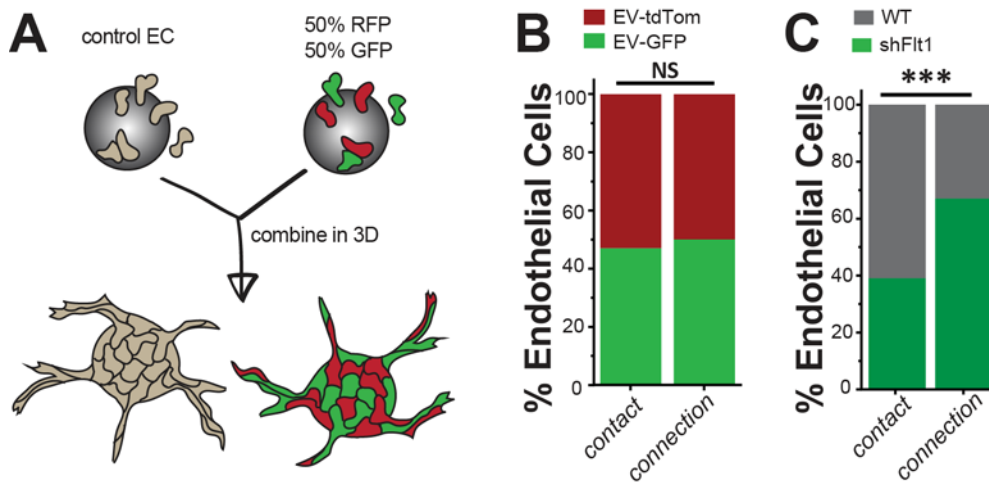

**Figure S4: Transient Contacts and Stable Connections in Mosaic Target Vessels.**

**(A)** Schematic of experimental design for mosaic vessel live-imaging analysis. **(B-C)** Percentage of transient contacts and stable connections with WT sprouts and endothelial cells with indicated manipulations in mosaic target vessels. (EV-tdTomato vs. EV-GFP, n=19 contacts, n=8 connections; shFlt1 vs. WT, n=95 contacts, n=36 connections). Statistics, Observed vs. Expected Binomial Test (\*\*\*,  $p < 0.001$ ; NS, not significant).

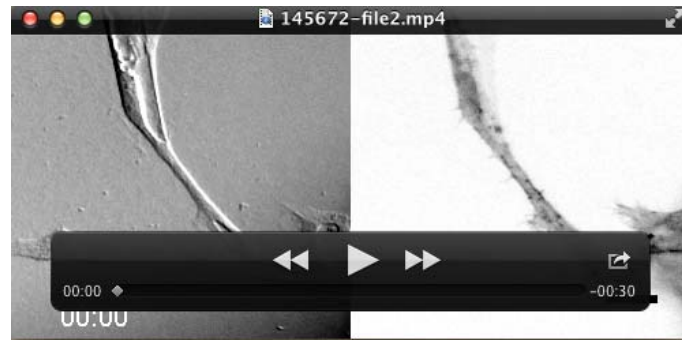

**Movie 1.** Connections were examined by time-lapse microscopy using a fluorescent LifeAct lentivirus, allowing simultaneous observation of both Differential Interference Contrast optics (DIC, left) and polymerized actin (right). Transient contacts (arrowheads) and stable connection (arrow) are noted. Insets, high magnification time frames for transient contacts and stable connections. For transient contacts, the frame showing the contact and the frame immediately following (and lacking the contact) are shown for clarity; for stable connections the first frame showing the connection is shown. Scale bar, 25  $\mu\text{m}$  (lower right); time, hrs:mins (lower left).

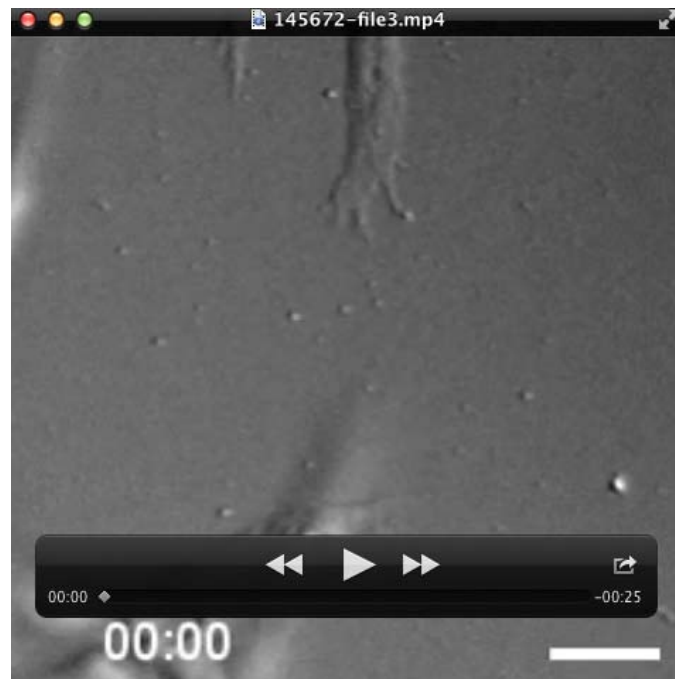

**Movie 2.** Wildtype HUVEC vessels were examined by time-lapse microscopy. Transient contacts (arrowhead) and stable connection (arrow) are noted. Insets, high magnification time frames for transient contacts and stable connections. For transient contacts, the frame showing the contact and the frame immediately following (and lacking the contact) are shown for clarity; for stable connections the first frame showing the connection is shown. An additional vessel is present outside the focal plane that was not scored. Scale bar, 25  $\mu\text{m}$  (lower right); time, hrs:mins (lower left).



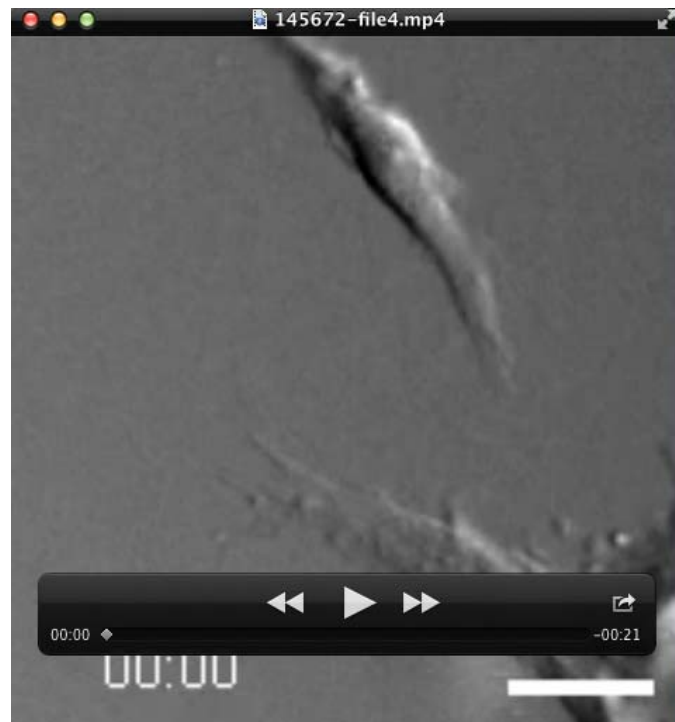

**Movie 3.** HUVEC vessels after lentivirus infection with shRNA against Flt1 were examined by time-lapse microscopy. Transient contacts (arrowhead) and stable connection (arrow) are noted. Insets, high magnification time frames for transient contacts and stable connections. For transient contacts, the frame showing the contact and the frame immediately following (and lacking the contact) are shown for clarity; for stable connections the first frame showing the connection is shown. Scale bar, 25  $\mu\text{m}$  (lower right); time, hrs:mins (lower left).

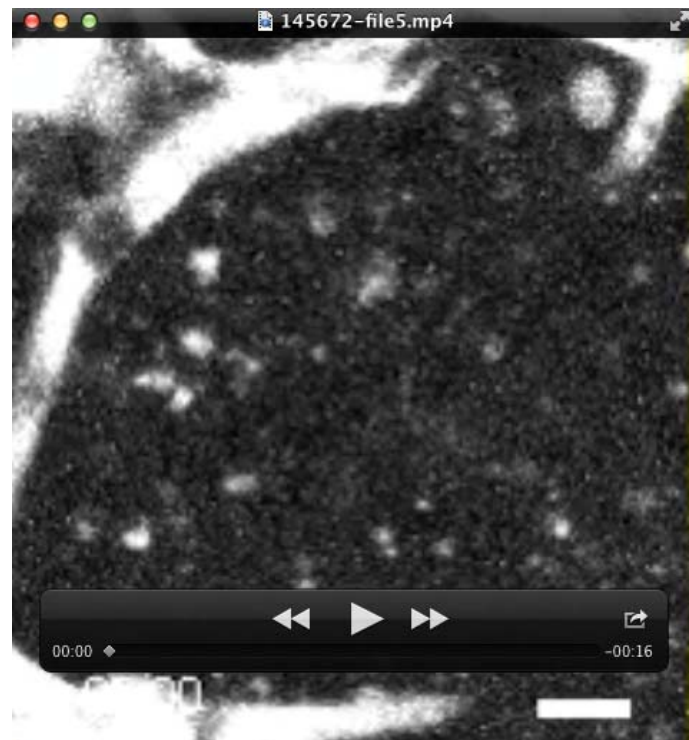

**Movie 4.** Wildtype mouse ES cell-derived vessels expressing PECAM-eGFP were examined by time-lapse microscopy. Transient contacts (arrowheads) and stable connection (arrow) are noted. Insets, high magnification time frames for transient contacts and stable connections. For transient contacts, the frame showing the contact and the frame immediately following (and lacking the contact) are shown for clarity; for stable connections the first frame showing the connection is shown. Scale bar, 25  $\mu\text{m}$  (lower right); time, hrs:mins (lower left).

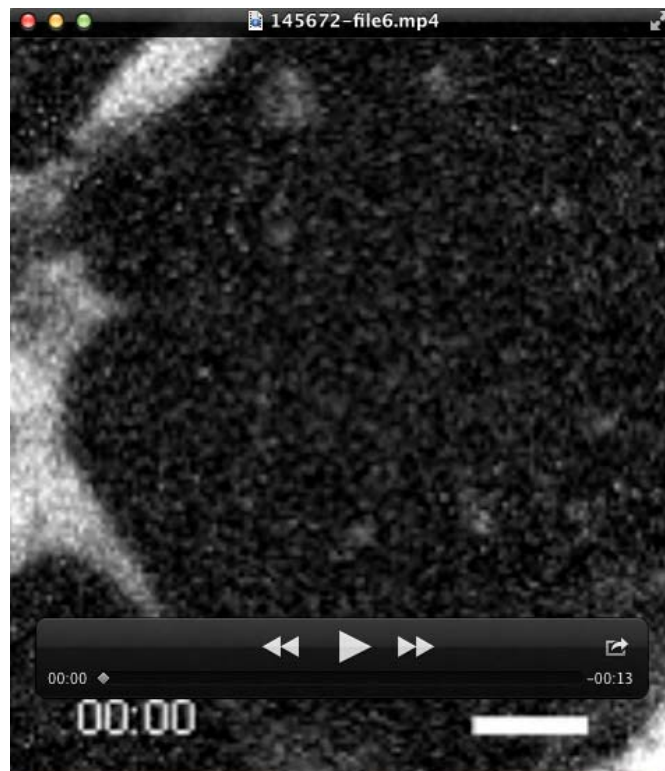

**Movie 5.** *flt1*<sup>-/-</sup> mutant mouse ES cell-derived vessels expressing PECAM-eGFP were examined by time-lapse microscopy. Stable connection (arrow) is noted. Inset, high magnification of first frame showing the stable connection. Scale bar, 25  $\mu$ m (lower right); time, hrs:mins (lower left).

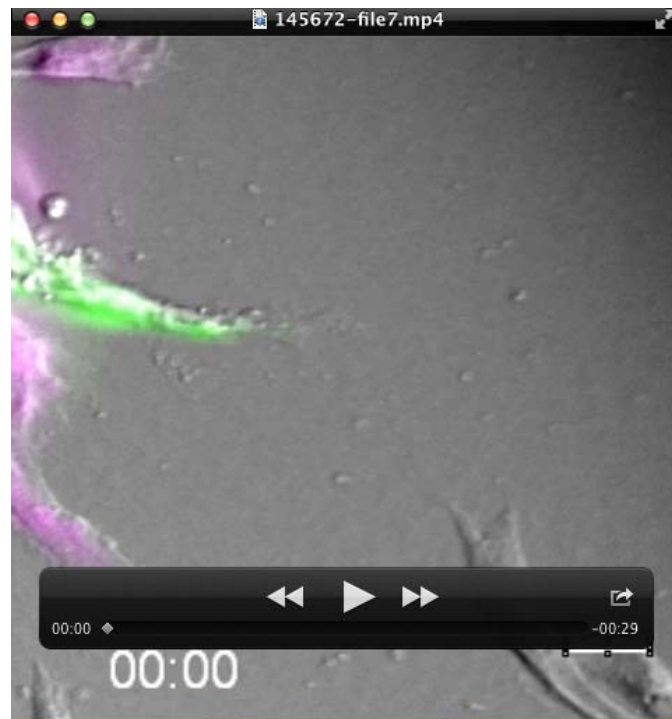

**Movie 6.** HUVEC vessels with either wildtype (WT, no cytoplasmic reporter) or a 50/50 mixture of untransfected cytoplasmic-tdTomato and cytoplasmic-eGFP transfected with si-Flt1 were examined by time-lapse microscopy. Stable connection (arrow) is noted. Inset, high magnification first frame showing a stable connection. Scale bar, 25  $\mu$ m (lower right); time, hrs:mins (lower left).
